# Supplementary material for: Magnitude and factors associated with nonadherence to antiepileptic drug treatment in Africa: A cross‐sectional multisite study
Source: PubMed Central journal article supplement (PMC5719857; doi:10.1002/epi4.12052), 2017-03-30
Supplement: EPI4-2-226-s001.pdf [file EPI4-2-226-s001.pdf]

## **Supplementary file 1: The SEEDS writing group**

*Agincourt HDSS, South Africa:* Ryan Wagner, Rhian Twine, Myles Connor, F Xavier Gómez Olivé, Mark Collinson, Kathleen Kahn, Stephen Tollman; *Ifakara HDSS, Tanzania:* Honratio Masanja, Alexander Mathew (deceased); *Iganga-Mayuge HDSS, Uganda:* Angelina Kakooza, George Pariyo, Stefan Peterson, Donald Ndyomughenyi; *Kilifi HDSS, Kenya:* Fredrick Ibinda (deceased), Symon M Kariuki, Anthony K Ngugi, Rachael Odhiambo, Eddie Chengo, Martin Chabi, Evasius Bauni, Gathoni Kamuyu, Victor Mung'ala Odera (deceased), James O Mageto, Charles R Newton; *Kintampo HDSS, Ghana:* Ken Ae-Ngibise, Bright Akpalu, Albert Akpalu, Francis Agbokey, Patrick Adjei, Seth Owusu-Agyei; *London School of Hygiene and Tropical Medicine, UK:* Christian Bottomley, Immo Kleinschmidt; *King's College London, UK:* Victor C K Doku; *Swiss Tropical Institute, Switzerland:* Peter Odermatt; *University College London, UK:* Brian Neville (deceased), Josemir W Sander, Steve White; *National Institutes of Health, USA:* Thomas Nutman; *Centers for Disease Control and Prevention, USA:* Patricia Wilkins, John Noh.

**Supplementary file 2: Factors investigated for an association with the epilepsy treatment gap in children and adults separately**

| <b>Children</b>                      | <b>Adults</b>                        |
|--------------------------------------|--------------------------------------|
| Age                                  | Age                                  |
| Sex                                  | Sex                                  |
| Mothers religious affiliation        | Religion                             |
| Mothers marital status               | Marital status                       |
| Mothers education level              | Level of education                   |
| Mothers occupation                   | Occupation                           |
| Fathers education level              | -                                    |
| Fathers occupation                   | -                                    |
| Mothers age at first birth           | -                                    |
| Sibling has seizures                 | Sibling has seizures                 |
| Snores more than three days per week | Snores more than three days per week |
| Place of birth (Home/hospital)       | Place of birth (Home/hospital)       |
| Presence of burn marks               | Presence of burn marks               |
| Sought traditional medicine          | Sought traditional medicine          |
| Previous hospitalisation             | Previous hospitalisation             |
| Learning difficulties                | Learning difficulties                |
| Neurological deficits                | Neurological deficits                |
| Frequent seizures                    | Frequent seizures                    |
| Focal seizures                       | Focal seizures                       |
| Status epilepticus                   | Status epilepticus                   |

Supplementary file 3: Comparison of the characteristics of the people with epilepsy who gave versus those who did not give blood.

| Characteristics                             | Sample assayed<br>n=1303 | Sample not assayed<br>n=888 | Univariate analysis   |        | Multivariable analysis* |             |
|---------------------------------------------|--------------------------|-----------------------------|-----------------------|--------|-------------------------|-------------|
|                                             |                          |                             | Odds ratio<br>(95%CI) | p-vale | Odds ratio<br>(95%CI)   | p-<br>vale  |
| <b>Sex: female</b>                          | 672 (51.6%)              | 454 (51.1%)                 | 1.02 (0.86-1.21)      | 0.84   | -                       | -           |
| <b>Sibling has seizures</b>                 |                          |                             |                       |        |                         |             |
| No                                          | 1156 (88.7%)             | 811 (91.3%)                 | 1                     |        | 1.12 (0.77-1.64)        |             |
| Yes                                         | 147 (11.3%)              | 77 (8.7%)                   | 1.34 (0.99-1.81)      | 0.05   | 1                       | 0.56        |
| <b>Snores more than three nights a week</b> |                          |                             |                       |        |                         |             |
| No                                          | 562 (45.4%)              | 415 (49.5%)                 | 1                     |        | 1                       |             |
| Yes                                         | 677 (54.6%)              | 424 (50.5%)                 | 1.18 (0.99-1.41)      | 0.07   | 1.04 (0.82-1.35)        | 0.68        |
| <b>Place of birth: home</b>                 |                          |                             |                       |        |                         |             |
| No                                          | 400 (31.5%)              | 365 (43.3%)                 | 1                     |        | 1                       |             |
| Yes                                         | 869 (68.5%)              | 477 (56.7%)                 | 1.66 (1.38-2.00)      | <0.001 | 1.15 (0.88-1.55)        | 0.35        |
| <b>Burn marks</b>                           |                          |                             |                       |        |                         |             |
| No                                          | 1064 (81.8%)             | 776 (87.4%)                 | 1                     |        | 1                       |             |
| Yes                                         | 236 (18.2%)              | 112 (12.6%)                 | 1.54 (1.20-1.98)      | <0.001 | 1.17 (0.84-1.66)        | 0.36        |
| <b>Sought traditional medicine</b>          |                          |                             |                       |        |                         |             |
| No                                          | 305 (25.4%)              | 258 (33.0%)                 | 1                     |        | 1                       |             |
| Yes                                         | 896 (74.6%)              | 525 (67.0%)                 | 1.44 (1.18-1.77)      | <0.001 | 1.06 (0.79-1.43)        | 0.71        |
| <b>Previous hospitalisation</b>             |                          |                             |                       |        |                         |             |
| No                                          | 725 (56.0%)              | 512 (58.0%)                 | 1                     |        |                         |             |
| Yes                                         | 569 (44.0%)              | 370 (42.0%)                 | 1.09 (0.91-1.30)      | 0.35   | -                       | -           |
| <b>Learning difficulties</b>                |                          |                             |                       |        |                         |             |
| No                                          | 996 (76.7%)              | 691 (77.8%)                 | 1                     |        | -                       | -           |
| Yes                                         | 303 (23.3%)              | 197 (22.2%)                 | 1.06 (0.86-1.32)      | 0.94   |                         |             |
| <b>Neurological deficits</b>                |                          |                             |                       |        |                         |             |
| No                                          | 1123 (86.4%)             | 745 (83.9%)                 | 1                     |        |                         |             |
| Yes                                         | 177 (13.6%)              | 143 (16.1%)                 | 0.82 (0.64-1.05)      | 0.11   | <b>0.70 (0.50-0.98)</b> | <b>0.03</b> |
| <b>Frequent seizures</b>                    |                          |                             |                       |        |                         |             |
| No                                          | 571 (67.0%)              | 329 (62.9%)                 | 1                     |        |                         |             |
| Yes                                         | 281 (33.0%)              | 194 (37.1%)                 | 0.83 (0.66-1.06)      | 0.12   | 0.84 (0.65-1.09)        | 0.22        |
| <b>Focal seizures</b>                       |                          |                             |                       |        |                         |             |
| No                                          | 667 (51.2%)              | 543 (61.1%)                 | 1                     |        |                         |             |
| Yes                                         | 636 (48.8%)              | 345 (38.9%)                 | 1.50 (1.26-1.79)      | <0.001 | <b>1.38 (1.07-1.75)</b> | <b>0.02</b> |
| <b>Status epilepticus</b>                   |                          |                             |                       |        |                         |             |
| No                                          | 905 (76.1%)              | 525 (73.9%)                 | 1                     |        |                         |             |
| Yes                                         | 284 (23.9%)              | 185 (26.1%)                 | 0.89 (0.72-1.11)      | 0.29   |                         |             |

\*Multivariable analysis is adjusted for being a child.

Supplementary file 4: Characteristics of the study participants: children

| Characteristics                       | Agincourt<br>n=47 | Ifakara<br>n=131 | Iganga-Maguye<br>n=75 | Kintampo n=88    | All five sites<br>combined n=570 | p value‡ |
|---------------------------------------|-------------------|------------------|-----------------------|------------------|----------------------------------|----------|
| <b>Childs age (median (IQR))</b>      | 12.0 (7.0-14.5)   | 11.6 (7.3-15.0)  | 7.0 (5.0-12.0)        | 13.0 (10.8-15.0) | 11.0 (7.0-14.8)                  | <0.001   |
| <b>Sex :Female</b>                    | 27 (57.4%)        | 64 (48.9%)       | 39 (52.0%)            | 51 (58.0%)       | 305 (53.5.0%)                    | 0.69     |
| <b>Mothers marital status</b>         |                   |                  |                       |                  |                                  |          |
| Married                               | 18 (38.3%)        | 99 (75.6%)       | 66 (88.0%)            | 70 (79.5%)       | 440 (77.2%)                      |          |
| Single/separated/divorced/windowed    | 29 (61.7%)        | 32 (24.4%)       | 9 (12.0%)             | 18 (20.5%)       | 130 (22.8%)                      | <0.001   |
| <b>Mothers education level</b>        |                   |                  |                       |                  |                                  |          |
| Post primary                          | 19 (57.6%)        | 1(1.4%)          | 14 (37.8%)            | 14 (66.7%)       | 207 (79.6%)                      |          |
| ≤ Primary school                      | 14 (42.4%)        | 72 (98.6%)       | 23 (62.2%)            | 7 (33.3%)        | 53 (20.4%)                       | <0.001*  |
| <b>Mother's religious affiliation</b> |                   |                  |                       |                  |                                  |          |
| Christianity                          | 12 (100%)         | 94 (76.4%)       | 32 (42.7%)            | 48 (69.6%)       | 330 (67.3%)                      |          |
| Islam                                 | 0                 | 29 (23.6%)       | 43 (57.3%)            | 21 (30.4%)       | 126 (25.7%)                      |          |
| Traditionalist                        | 0                 | 0                | 0                     | 0                | 34 (6.9%)                        | <0.001*  |
| <b>Mother's occupation</b>            |                   |                  |                       |                  |                                  |          |
| Employed                              | 2 (28.6%)         | 2 (2.2%)         | 7 (31.8%)             | 3 (4.8%)         | 38 (12.5%)                       |          |
| Unemployed                            | 5 (71.4%)         | 89 (97.8%)       | 15 (68.2%)            | 59 (95.2%)       | 265 (87.5%)                      | <0.001*  |
| <b>Father's education level</b>       |                   |                  |                       |                  |                                  |          |
| ≤ Primary school level                | 13 (50.0%)        | 69 (97.2%)       | 23 (76.7%)            | 10 (26.3%)       | 224 (71.1%)                      |          |
| Post primary                          | 13 (50.0%)        | 2 (2.8%)         | 7 (23.3%)             | 28 (73.7%)       | 91 (28.9%)                       | <0.001   |
| <b>Father's occupation</b>            |                   |                  |                       |                  |                                  |          |
| Employed                              | 9 (64.3%)         | 6 (8.1%)         | 16 (47.1%)            | 4 (6.0%)         | 98 (28.7%)                       |          |
| Unemployed                            | 5 (35.7%)         | 68 (91.9%)       | 18 (52.9%)            | 63 (94.0%)       | 243(71.3%)                       | <0.001*  |
| <b>Mothers age at first birth</b>     |                   |                  |                       |                  |                                  |          |
| < 18 years                            | 11 (28.2%)        | 26 (32.9%)       | 25 (52.1%)            | 41 (52.6%)       | 169 (41.4%)                      |          |
| ≥ 18 years                            | 28 (71.8%)        | 53 (67.1%)       | 23 (47.9%)            | 37 (47.4%)       | 239 (58.6%)                      | 0.02     |
| <b>Sibling has seizures</b>           |                   |                  |                       |                  |                                  |          |
| Yes                                   | 43 (91.5%)        | 123 (93.9%)      | 64 (85.3%)            | 65 (73.9%)       | 506 (88.8%)                      |          |
| No                                    | 4 (8.5%)          | 8 (6.1%)         | 11(14.7%)             | 23 (26.1%)       | 64 (11.2%)                       | <0.001*  |
| <b>Place of birth: home</b>           |                   |                  |                       |                  |                                  |          |
| Yes                                   | 12 (26.1%)        | 52(40.9%)        | 23 (30.7%)            | 73 (83.9%)       | 359 (63.8%)                      |          |
| No                                    | 34 (73.9%)        | 75 (59.1%)       | 52 (69.3%)            | 14 (16.1%)       | 204 (36.2%)                      | <0.001   |
| <b>Burn marks</b>                     |                   |                  |                       |                  |                                  |          |
| Yes                                   | 1 (2.1%)          | 14 (10.7%)       | 1(1.3%)               | 8 (9.2%)         | 60 (10.5%)                       |          |
| No                                    | 46 (97.9%)        | 117 (89.3%)      | 74 (98.7%)            | 79 (90.8%)       | 509 (89.5%)                      | 0.001*   |
| <b>Sought traditional medicine</b>    |                   |                  |                       |                  |                                  |          |
| Yes                                   | 20 (71.4%)        | 87(77.0%)        | 37 (52.1%)            | 63 (75.0%)       | 359 (69.0%)                      |          |
| No                                    | 8 (28.6%)         | 26 (23.0%)       | 34 (47.9%)            | 21 (25.0%)       | 161 (31.0%)                      | 0.006    |
| <b>Previous hospitalisation</b>       |                   |                  |                       |                  |                                  |          |

|                              |            |             |            |            |             |        |
|------------------------------|------------|-------------|------------|------------|-------------|--------|
| Yes                          | 6 (13.0%)  | 68 (52.3%)  | 5 (6.7%)   | 36 (41.4%) | 265 (46.8%) |        |
| No                           | 40 (87.0%) | 62 (47.7%)  | 70 (93.7%) | 51 (58.6%) | 301 (53.2%) | <0.001 |
| <b>Learning difficulties</b> |            |             |            |            |             |        |
| Yes                          | 7 (14.9%)  | 15 (11.5%)  | 10 (13.3%) | 19 (21.8%) | 108 (19.0%) |        |
| No                           | 40 (85.1%) | 116 (88.5%) | 65 (86.7%) | 68 (78.2%) | 461 (81.0%) | 0.01   |
| <b>Neurological deficits</b> |            |             |            |            |             |        |
| Yes                          | 4 (8.5%)   | 11 (8.4%)   | 10 (13.3%) | 10 (11.5%) | 75 (13.2%)  |        |
| No                           | 43 (91.5%) | 120 (91.6%) | 65 (86.7%) | 77 (88.5%) | 494 (86.8%) | 0.12   |
| <b>Frequent seizures</b>     |            |             |            |            |             |        |
| No                           | 44 (95.7%) | 113 (86.3%) | 65 (86.7%) | 72 (81.8%) | 486 (85.4%) |        |
| Yes                          | 2 (4.3%)   | 18 (13.7%)  | 10 (13.3%) | 16 (18.2%) | 83 (14.6%)  | 0.001  |
| <b>Focal seizures</b>        |            |             |            |            |             |        |
| No                           | 34 (72.3%) | 85 (64.9%)  | 53 (70.7%) | 63 (71.6%) | 302 (53.0%) |        |
| Yes                          | 13 (27.7%) | 46 (35.1%)  | 22 (29.3%) | 25 (28.4%) | 268 (47.0%) | 0.04   |
| <b>Status epilepticus</b>    |            |             |            |            |             |        |
| No                           | 28 (65.1%) | 97 (92.4%)  | 43 (59.7%) | 71 (87.7%) | 363 (69.4%) |        |
| Yes                          | 15 (34.9%) | 8 (7.6%)    | 29 (40.3%) | 10 (12.3%) | 160 (30.6%) | 0.39   |

‡ p values for differences in distribution of characteristics across the five sites; \* implies that a Fishers exact test was performed.

Supplementary file 5: Characteristics of the study participants: adults

| Characteristics                    | Agincourt<br>n=110 | Ifakara<br>n=133 | Iganga-Maguye<br>n=38 | Kintampo<br>n=179 | All five sites<br>combined†<br>n=733 | p value‡ |
|------------------------------------|--------------------|------------------|-----------------------|-------------------|--------------------------------------|----------|
| <b>Age (years):</b> median (IQR)   | 38.0 (27.0-47.0)   | 29.7 (23.2-40.5) | 30.5 (22.0-43.0)      | 26.0 (21.0-34.0)  | 29.0 (23.0-40.0)                     | <0.001   |
| <b>Sex :</b> Female                | 60 (54.5)          | 58 (43.6%)       | 20 (52.6)             | 98 (54.7)         | 367 (50.1%)                          | 0.26     |
| <b>Religion</b>                    |                    |                  |                       |                   |                                      |          |
| Christianity                       | 25 (100%)          | 100 (80.0%)      | 25 (71.4%)            | 115 (75.2%)       | 440 (75.2%)                          |          |
| Islam                              | 0                  | 23 (18.4%)       | 10 (28.6%)            | 34 (22.2%)        | 95 (16.2%)                           |          |
| Traditionalist                     | 0                  | 2 (1.6%)         | 0                     | 4 (2.6%)          | 50 (8.5%)                            | <0.001*  |
| <b>Marital status</b>              |                    |                  |                       |                   |                                      |          |
| Married                            | 30 (27.3%)         | 53 (40.8%)       | 12 (34.3%)            | 44 (25.3%)        | 222 (31.6%)                          |          |
| Single/separated/divorced/windowed | 80 (72.7%)         | 77 (59.2%)       | 23 (65.7%)            | 130 (74.7%)       | 480 (68.4%)                          | 0.05     |
| <b>Level of education</b>          |                    |                  |                       |                   |                                      |          |
| ≤ Primary school                   | 49 (62.0%)         | 64 (97.0%)       | 12 (52.2%)            | 6 (5.8%)          | 255 (62.8%)                          |          |
| Post primary                       | 30 (38.0%)         | 2 (3.0%)         | 11 (47.8%)            | 98 (94.2%)        | 151 (37.2%)                          | <0.001   |
| <b>Occupation</b>                  |                    |                  |                       |                   |                                      |          |
| Employed                           | 2 (66.7%)          | 0                | 2 (25.0%)             | 1 (1.4%)          | 20 (8.1%)                            |          |
| Unemployed                         | 1 (33.3%)          | 75 (100%)        | 6 (75.0%)             | 71 (98.6%)        | 227 (92.9%)                          | <0.001*  |
| <b>Sibling has seizures</b>        |                    |                  |                       |                   |                                      |          |
| Yes                                | 5 (4.5%)           | 20 (15.0%)       | 4 (10.5%)             | 37 (20.7%)        | 83 (11.3%)                           |          |
| No                                 | 105 (95.5%)        | 113(85.0%)       | 34(89.5%)             | 142 (79.3%)       | 650 (88.7%)                          | <0.001*  |
| <b>Place of birth: home</b>        |                    |                  |                       |                   |                                      |          |
| Yes                                | 52 (49.0%)         | 75 (64.1%)       | 14 (36.8%)            | 154 (87.5%)       | 510 (72.2%)                          |          |
| No                                 | 50 (51.0%)         | 42 (35.9%)       | 24 (63.2%)            | 22 (12.5%)        | 196 (27.8%)                          | <0.001   |
| <b>Burn marks</b>                  |                    |                  |                       |                   |                                      |          |
| Yes                                | 25 (22.7%)         | 28 (21.1%)       | 6 (15.8%)             | 38 (21.5%)        | 176 (24.1%)                          |          |
| No                                 | 85 (77.3%)         | 105 (78.9%)      | 32 (84.2%)            | 139 (78.5%)       | 555 (75.9%)                          | 0.17     |
| <b>Sought traditional medicine</b> |                    |                  |                       |                   |                                      |          |
| Yes                                | 60 (67.7%)         | 100 (84.7%)      | 24 (63.2%)            | 141 (83.9%)       | 537 (78.9%)                          |          |
| No                                 | 30 (33.3%)         | 18 (15.3%)       | 14 (36.8%)            | 27 (16.1%)        | 144 (21.1%)                          | 0.001    |
| <b>Previous hospitalization</b>    |                    |                  |                       |                   |                                      |          |
| Yes                                | 25 (22.9%)         | 55 (41.7%)       | 5 (13.2%)             | 63 (35.2%)        | 304 (41.8%)                          |          |
| No                                 | 84 (77.1%)         | 77 (58.3%)       | 33 (86.8%)            | 116 (64.8%)       | 424 (58.2%)                          | <0.001   |
| <b>Learning difficulties</b>       |                    |                  |                       |                   |                                      |          |
| Yes                                | 37 (33.6%)         | 15 (11.3%)       | 10 (26.3%)            | 54 (30.7%)        | 195 (26.7%)                          |          |
| No                                 | 73 (66.4%)         | 118 (88.7%)      | 28 (73.7%)            | 122 (69.3%)       | 535 (73.3%)                          | <0.001   |
| <b>Neurological deficits</b>       |                    |                  |                       |                   |                                      |          |
| Yes                                | 25 (22.7%)         | 7 (5.3%)         | 9 (23.7%)             | 17 (9.6%)         | 102 (14.0%)                          |          |
| No                                 | 85 (77.3%)         | 126 (94.7%)      | 29 (76.3%)            | 160 (90.4%)       | 629 (86.0%)                          | <0.001   |
| <b>Frequent seizures</b>           |                    |                  |                       |                   |                                      |          |
| Yes                                | 7 (6.4%)           | 14(10.5%)        | 3 (7.9%)              | 20 (11.2%)        | 78 (10.6)                            |          |

|                           |             |             |            |             |             |        |
|---------------------------|-------------|-------------|------------|-------------|-------------|--------|
| No                        | 103 (93.6%) | 119 (89.5%) | 38 (92.1%) | 159 (88.8%) | 655 (89.4%) | 0.51*  |
| <b>Focal seizures</b>     |             |             |            |             |             |        |
| Yes                       | 55 (50.0%)  | 40 (30.1%)  | 18 (47.4%) | 69 (38.5%)  | 368 (50.2%) |        |
| No                        | 55 (50.0%)  | 93 (69.9%)  | 20 (52.6%) | 110 (61.5%) | 365 (49.8%) | <0.001 |
| <b>Status epilepticus</b> |             |             |            |             |             |        |
| Yes                       | 21 (21.4%)  | 2 (2.1%)    | 17 (48.6%) | 9 (5.3%)    | 21 (21.4%)  |        |
| No                        | 77 (78.6%)  | 93 (97.9%)  | 18 (51.4%) | 162 (94.7%) | 77 (78.6%)  | <0.001 |

‡ p values for differences in distribution of characteristics across the five sites; \* implies that a Fishers exact test was performed.

**Supplementary file 6: Cross classification of the reported AEDs and the detected AEDS among the PWE who reported taking AEDs**

| AED reported            | AED detected |         |         |         |         |         |             |
|-------------------------|--------------|---------|---------|---------|---------|---------|-------------|
|                         | PB only      | PH only | CB only | PB & PH | PB & CB | PH & CB | PB, PH & CB |
| Phenobarbital (PB) only | 134          | 3       | 1       | 25      | 0       | 1       | 3           |
| Phenytoin (PH) only     | 0            | 8       | 0       | 0       | 0       | 0       | 0           |
| Carbamazepine (CB) only | 2            | 1       | 8       | 0       | 0       | 4       | 0           |
| PB & PH                 | 22           | 6       | 0       | 24      | 2       | 1       | 1           |
| PB & CB                 | 10           | 1       | 6       | 0       | 7       | 0       | 7           |
| PH & CB                 | 0            | 0       | 0       | 0       | 0       | 1       | 0           |



**Supplementary file 7: Magnitude of site specific non-adherence to AEDs**

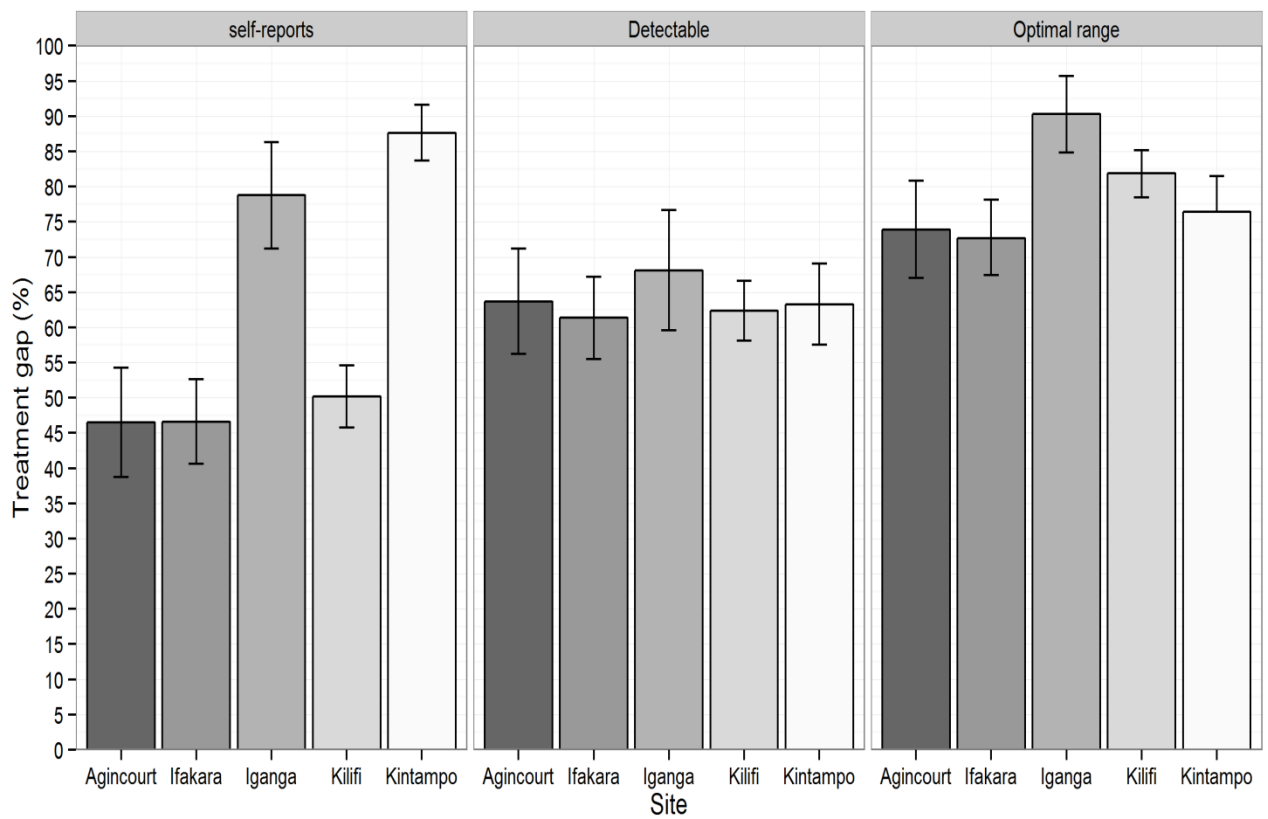

A graphical representation of the non-adherence to AEDs for each of the five sites based on self-reports, and as measured by detectable and optimal levels of anti-epileptic drugs in the blood.

**Supplementary file 8: Magnitude of age specific non-adherence of AEDs**

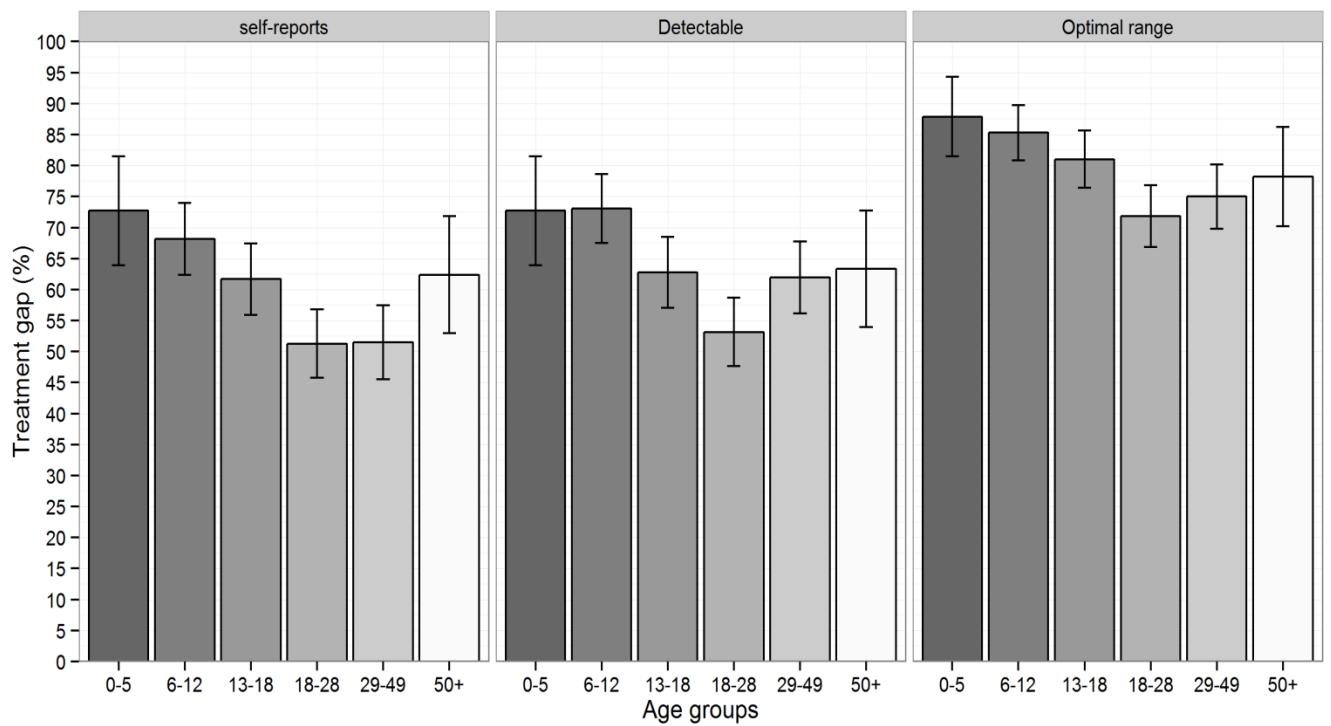

A graphical representation of the non-adherence to AEDs by age groups based on self-reports, and as measured by detectable and optimal levels of anti-epileptic drugs in the blood.

Supplementary file 9: Characteristics associated with being a child among people with epilepsy who did not have optimal levels of anti-epileptic drugs in blood.

| Characteristics                    |                  |                | Univariable analysis |                  | Multivariable analysis  |                  |
|------------------------------------|------------------|----------------|----------------------|------------------|-------------------------|------------------|
|                                    | Children (n=484) | Adults (n=541) | Odds ratio (95%CI)   | p value          | Odds ratio (95%CI)      | p value          |
| <b>Sex: female</b>                 | 162 (33.5%)      | 272 (50.3%)    | 1.60 (1.40-1.82)     | <b>0.001</b>     | 1.60 (1.40-1.82)        | <b>0.001</b>     |
| <b>Sibling has seizures</b>        |                  |                |                      |                  |                         |                  |
| No                                 | 432 (89.3%)      | 484 (89.5%)    | 1                    |                  |                         |                  |
| Yes                                | 52 (10.7%)       | 57 (10.5%)     | 1.10 (0.75-1.62)     | 0.69             | -                       | -                |
| <b>Place of birth: home</b>        |                  |                |                      |                  |                         |                  |
| No                                 | 174 (36.4%)      | 134 (25.7%)    | 1                    |                  |                         |                  |
| Yes                                | 304 (63.6%)      | 388 (74.3%)    | 0.68 (0.49-0.92)     | <b>0.01</b>      | 0.79 (0.55-1.09)        | 0.16             |
| <b>Burn marks</b>                  |                  |                |                      |                  |                         |                  |
| No                                 | 436 (90.1%)      | 421 (78.1%)    | 1                    |                  |                         |                  |
| Yes                                | 48 (9.9%)        | 118 (21.9%)    | 0.39 (0.27-0.57)     | <b>&lt;0.001</b> | <b>0.41 (0.28-0.63)</b> | <b>&lt;0.001</b> |
| <b>Sought traditional medicine</b> |                  |                |                      |                  |                         |                  |
| No                                 | 140 (31.7%)      | 117 (23.3%)    | 1                    |                  |                         |                  |
| Yes                                | 302 (68.3%)      | 385 (76.7%)    | 0.68 (0.50-0.92)     | <b>0.02</b>      | 0.75 (0.53-1.03)        | 0.08             |
| <b>Previous hospitalisation</b>    |                  |                |                      |                  |                         |                  |
| No                                 | 267 (55.5%)      | 320 (59.7%)    | 1                    |                  |                         |                  |
| Yes                                | 214 (44.5%)      | 216 (40.3%)    | 1.25 (0.97-1.64)     | <b>0.10</b>      | -                       | -                |
| <b>Learning difficulties</b>       |                  |                |                      |                  |                         |                  |
| No                                 | 402 (83.1%)      | 400 (74.3%)    | 1                    |                  |                         |                  |
| Yes                                | 82 (16.9%)       | 138 (25.7%)    | 0.59 (0.43-0.81)     | <b>&lt;0.001</b> | <b>0.63 (0.44-0.89)</b> | <b>0.01</b>      |
| <b>Neurological deficits</b>       |                  |                |                      |                  |                         |                  |
| No                                 | 420 (86.8%)      | 462 (85.7%)    | 1                    |                  |                         |                  |
| Yes                                | 64 (13.2%)       | 77 (14.3%)     | 0.92 (0.65-1.30)     | 0.62             | -                       | -                |
| <b>Frequent seizures</b>           |                  |                |                      |                  |                         |                  |
| No                                 | 416 (86.1%)      | 480 (88.7%)    | 1                    |                  |                         |                  |
| Yes                                | 67 (13.9%)       | 61 (11.3%)     | 1.25 (0.86-1.84)     | 0.24             | 1.26 (0.82-1.92)        | 0.26             |
| <b>Focal seizures</b>              |                  |                |                      |                  |                         |                  |
| No                                 | 259 (53.5%)      | 269 (49.7%)    | 1                    |                  |                         |                  |
| Yes                                | 225 (46.5%)      | 272 (50.3%)    | 0.83 (0.63-1.10)     | 0.16             | 0.84 (0.61-1.12)        | 0.23             |
| <b>Status epilepticus</b>          |                  |                |                      |                  |                         |                  |
| No                                 | 304 (68.6%)      | 393 (80.2%)    | 1                    |                  |                         |                  |
| Yes                                | 139 (31.4%)      | 97 (19.8%)     | 1.82 (1.33-2.53)     | <b>&lt;0.001</b> | <b>1.98 (1.40-2.88)</b> | <b>&lt;0.001</b> |

\*lack of previous hospitalisation was associated with lack of burn marks and was therefore not entered in the multivariable model. IQR = interquartile range; CI= confidence interval.
